# Supplementary material for: A high flux ultrafiltration membrane with a multi-hydrophilic particle additive and controlled self-assembly of micellar particles
Source: Royal Society of Chemistry journal article supplement (doi:10.1039/d4nj00540f), 2024-01-01

*Supporting Materials for*

**A High Flux Ultrafiltration Membrane with Multi-hydrophilic Particles Winding and Controlled Self-assembly of Micellar Particles**

Dongli Guo<sup>1,2,#</sup>, Zehua Yin<sup>2,#,\*</sup>, Mingyu Zhang<sup>1</sup>, Mohammed Kamal Hadi<sup>1</sup>, Zhijiang Sun<sup>1</sup>, Tao Yao<sup>1</sup>, Fen Ran<sup>1,\*</sup>

<sup>1</sup> *State Key Laboratory of Advanced Processing and Recycling of Non-ferrous Metals, Department of Polymeric Materials Engineering, School of Materials Science and Engineering, Lanzhou University of Technology, Lanzhou, 730050, Gansu, China*

<sup>2</sup> *Jiangsu Solicitude Medical Technology Co., Ltd., Suzhou, 215100, Jiangsu, China*

*\*Corresponding Authors: Dr. Zehua Yin ([yinzehua@smtworld.com](mailto:yinzehua@smtworld.com)), or Dr. Prof. Fen Ran ([ranfen@lut.edu.cn](mailto:ranfen@lut.edu.cn), or [ranfen@163.com](mailto:ranfen@163.com)).*

*# Those authors contribute equally to this work.*

**Table S1.** *The formula composition of 407 blend casting solution with different addition amounts of M-PES-407 membrane.*

| Samples  | PES (g) | PVP k85 (g) | DMAc (mL) | Additives 407 (g) |
|----------|---------|-------------|-----------|-------------------|
| <b>1</b> | 1.6     | 0.1         | 8.2       | 0.1               |
| <b>2</b> | 1.5     | 0.1         | 8.2       | 0.2               |
| <b>3</b> | 1.4     | 0.1         | 8.2       | 0.3               |
| <b>4</b> | 1.35    | 0.1         | 8.2       | 0.35              |
| <b>5</b> | 1.3     | 0.1         | 8.2       | 0.4               |
| <b>6</b> | 1.25    | 0.1         | 8.2       | 0.45              |

**Table S2.** *The surface roughness of M-PES-407, M-PES-407-PDA.M-PES-407@DA membranes.*

| Samples       | R <sub>a</sub> ( $\mu\text{m}$ ) | R <sub>q</sub> ( $\mu\text{m}$ ) | R <sub>t</sub> ( $\mu\text{m}$ ) |
|---------------|----------------------------------|----------------------------------|----------------------------------|
| M-PES-407     | 1.07                             | 1.30                             | 8.14                             |
| M-PES-407-PDA | 0.717                            | 2.73                             | 42.7                             |
| M-PES-407@DA  | 1.21                             | 1.55                             | 10.4                             |

**Figure S1.** UV curves of membranes. (a) Self-polymerization of DA in oxygen at different times (1h, 2h, 4h, 8h, 10h, 24h, 48h); (b) DA: APS=1:1; (c) DA: APS=1:2; (d) The three membranes: Self-polymerization, DA: APS=1:1, DA: APS=1:2 compare the UV absorption curves at 1h.

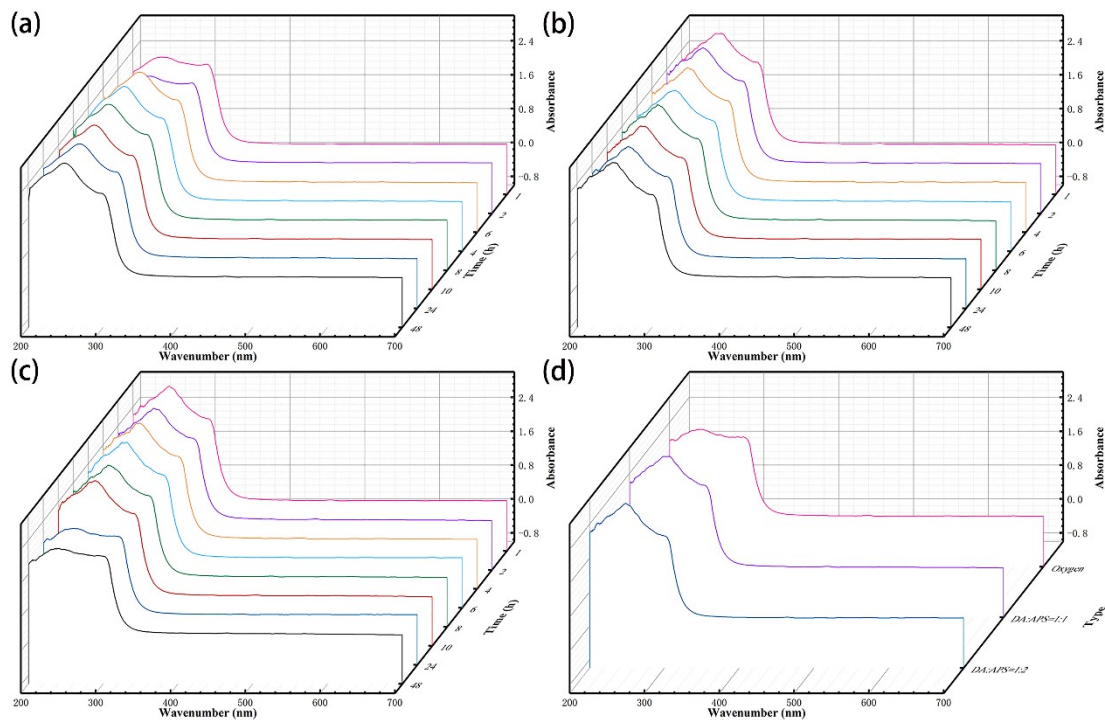

**Table S3.** *Data on the elemental content of XPS on three types of membranes.*

| <b>Samples</b> | <b>Membrane surface atomic content (%)</b> |      |       |      | <b>Ratio</b> |       |
|----------------|--------------------------------------------|------|-------|------|--------------|-------|
|                | C                                          | N    | O     | S    | N/C          | O/C   |
| M-PES-407      | 74.51                                      | 1.49 | 19.55 | 4.44 | 0.020        | 0.262 |
| M-PES-407-PDA  | 75.43                                      | 3.82 | 19.08 | 1.66 | 0.0506       | 0.253 |
| M-PES-407@DA   | 75.41                                      | 1.88 | 17.80 | 4.92 | 0.025        | 0.236 |

**Figure S2.** *Physical photos of three types of membranes dissolved in the original solvent (DMAc).*

**Low concentration**

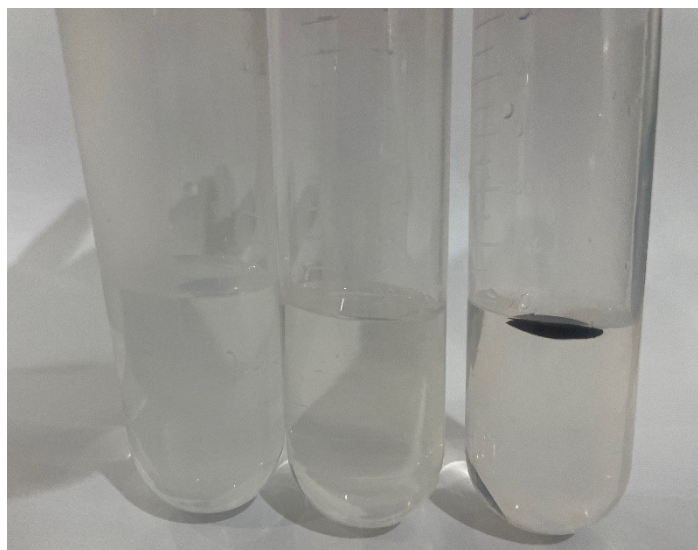

**High concentration**

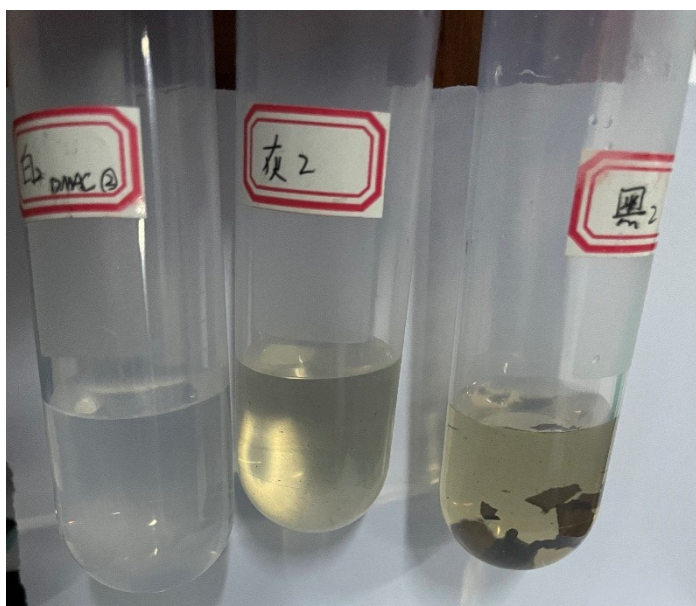

Supplement: d4nj00540f1.pdf [file d4nj00540f1.pdf]
